# Supplementary material
Source: Springer Nature journal article supplement (https://www.springermedizin.de/resource/supplementary/12874_2008_354_MOESM4_ESM.pdf/9434296)

Questionnaires **emailed** to a random sample of patients who visited in the last week.

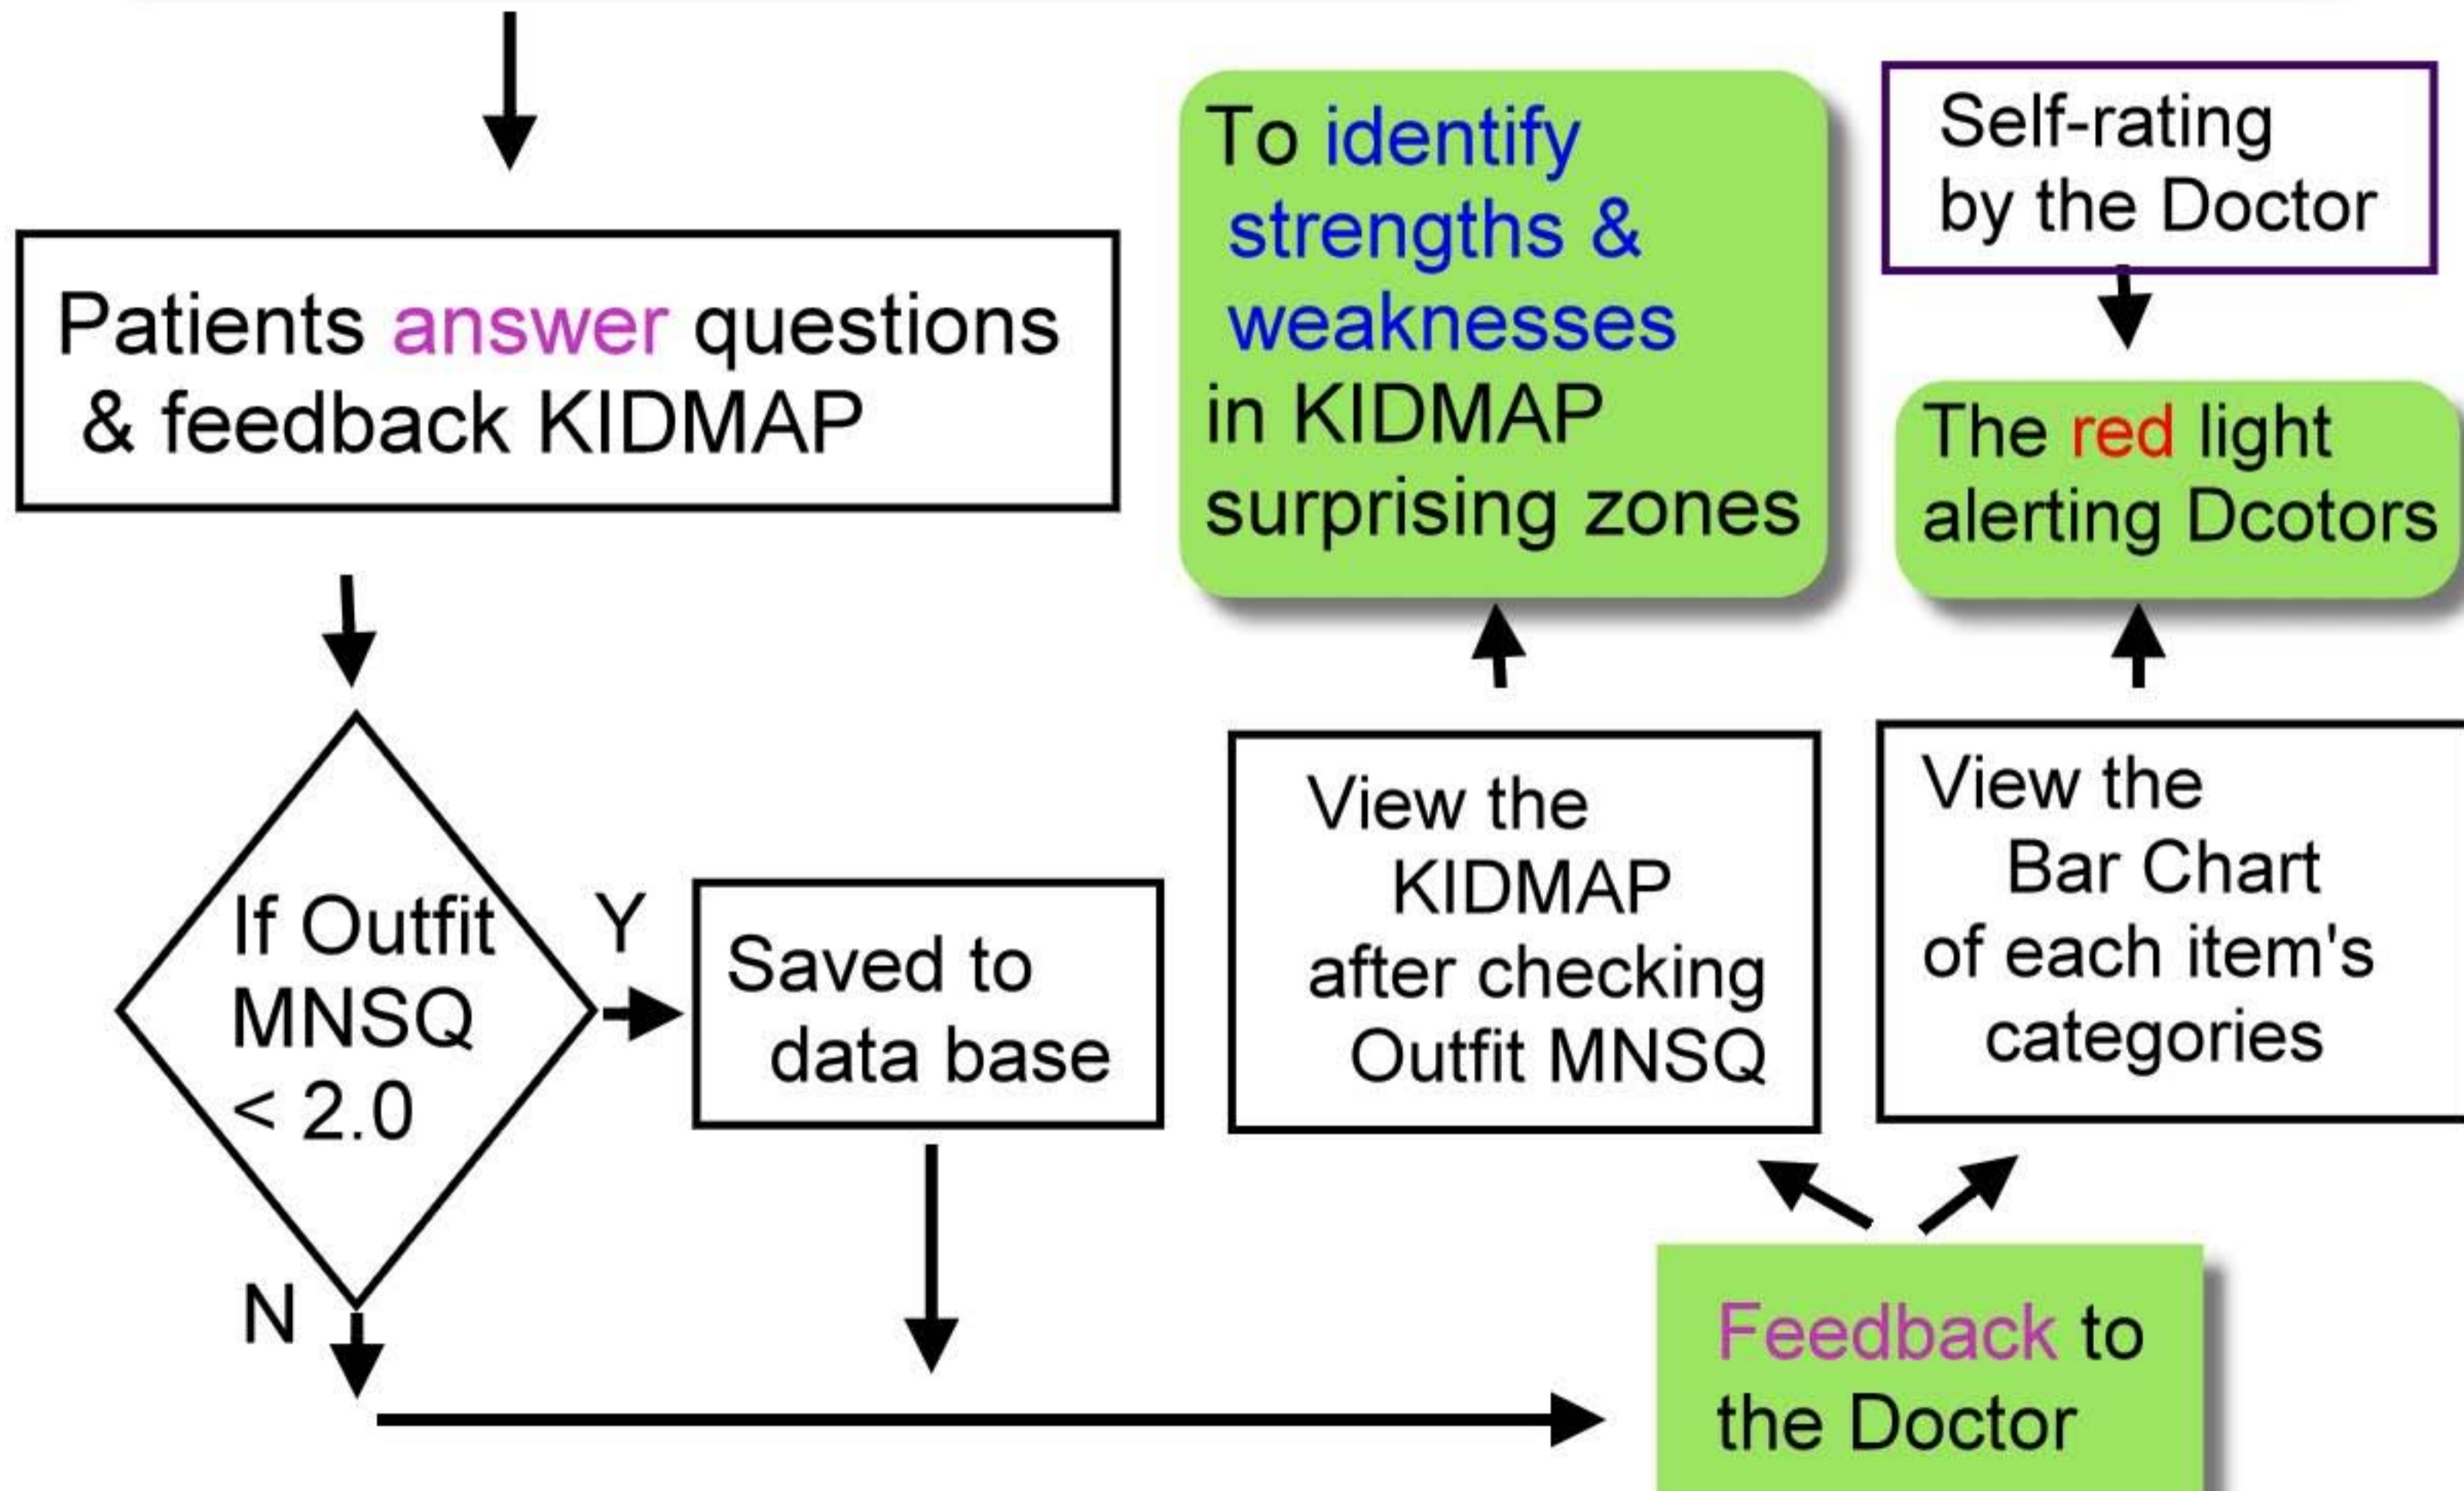

Supplement: MOESM4 [file 9434296]
